# Supplementary material for: A new class of electroactive Fe- and P-functionalized graphene for oxygen reduction
Source: Royal Society of Chemistry journal article supplement (doi:10.1039/c5ta00970g), 2015-01-01
Supplement: c5ta00970g1.pdf [file c5ta00970g1.pdf]

## Supporting information

### A new class electroactive Fe and P-functionalized graphene for oxygen reduction

Fatemeh Razmjooei, Kiran Pal Singh, Eun Jin Bae and Jong-Sung Yu\*

Department of Energy Systems Engineering, Daegu Gyeongbuk Institute of Science and

Technology (DGIST), Daegu 711-873, Republic of Korea,

E-mail: jsyu@dgist.ac.kr, Tel: (+82)-53-785-6443, Fax: (+82)-53-785-6409

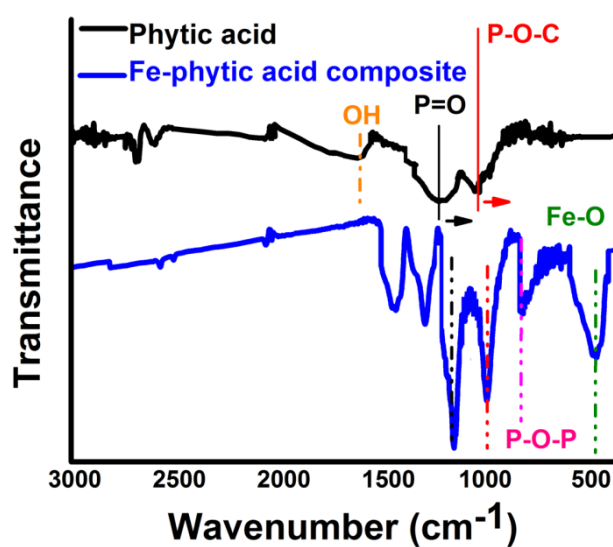

**Fig. S1** FT-IR spectra of phytic acid and Fe-phytic acid composite.

**Table S1** Structural characteristics by nitrogen sorption data of pristine, P-doped, and Fe and P-functionalized RGO samples

| Physical characteristics |                                                          |                                                         |                                                |                                                    |                    |
|--------------------------|----------------------------------------------------------|---------------------------------------------------------|------------------------------------------------|----------------------------------------------------|--------------------|
| Sample                   | BET total surface area (m <sup>2</sup> g <sup>-1</sup> ) | Mesopore surface area (m <sup>2</sup> g <sup>-1</sup> ) | Pore volume (cm <sup>3</sup> g <sup>-1</sup> ) | Mesopore volume (cm <sup>3</sup> g <sup>-1</sup> ) | BJH pore size (nm) |
| RGO                      | 188.15                                                   | 89.8                                                    | 0.19                                           | 0.13                                               | 3.15               |
| GP                       | 514.16                                                   | 332.9                                                   | 0.45                                           | 0.26                                               | 3.16               |
| GPF <sub>e</sub>         | 612.15                                                   | 397.5                                                   | 0.56                                           | 0.35                                               | 3.17               |

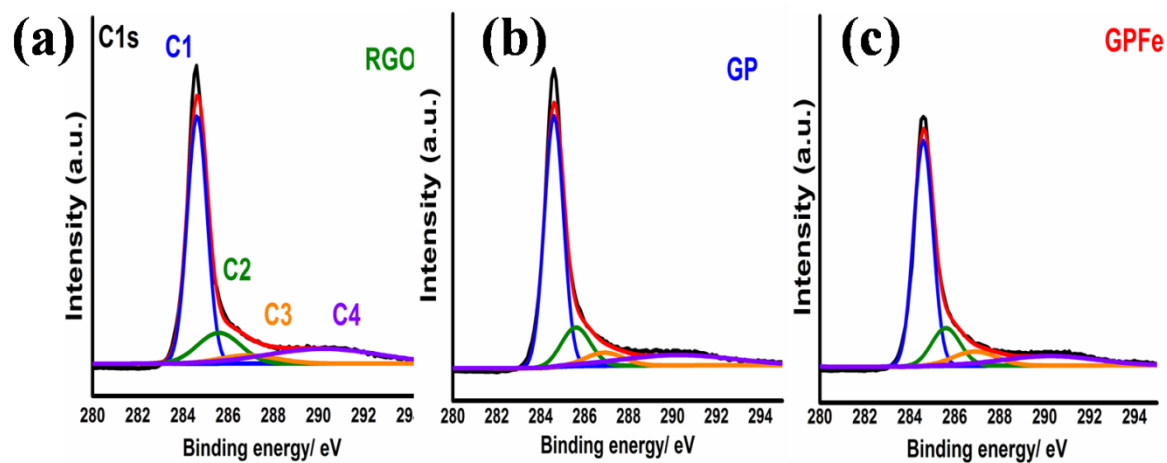

**Fig. S2** Deconvoluted XPS spectra of C 1s for (a) pristine RGO, (b) GP, and (c) GPFe.

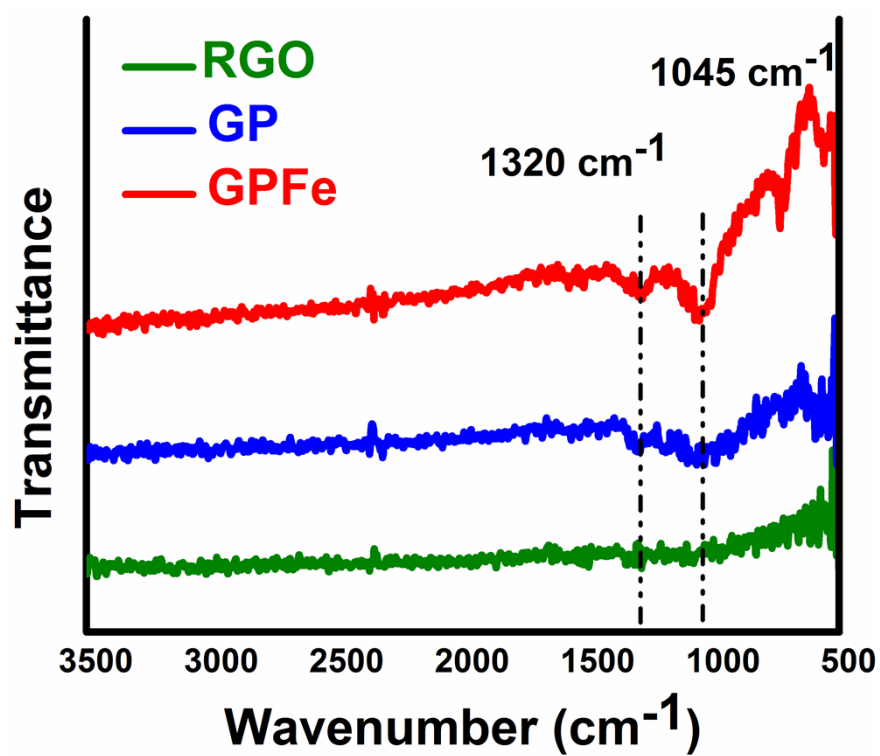

**Fig. S3** FT-IR spectra of pristine RGO, GP, and GPFe.

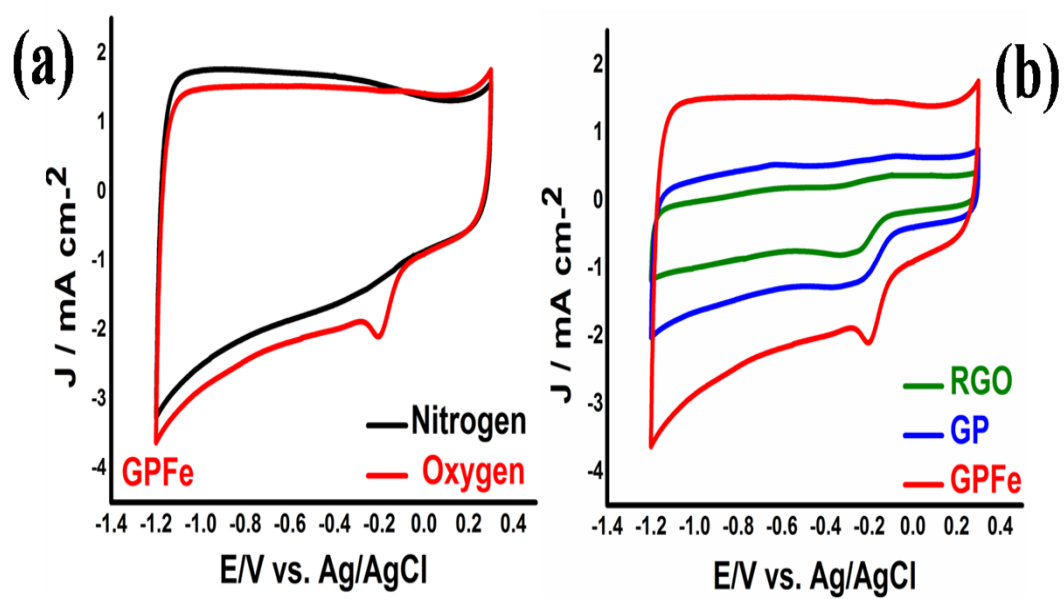

**Fig. S4** (a) CV curves at scan rate of  $50 \text{ mVs}^{-1}$  for GPFe in  $\text{N}_2$ - and  $\text{O}_2$ -saturated 0.1 M KOH, and (b) CV profiles for pristine RGO, GP, and GPFe in  $\text{O}_2$ -saturated 0.1 M KOH.

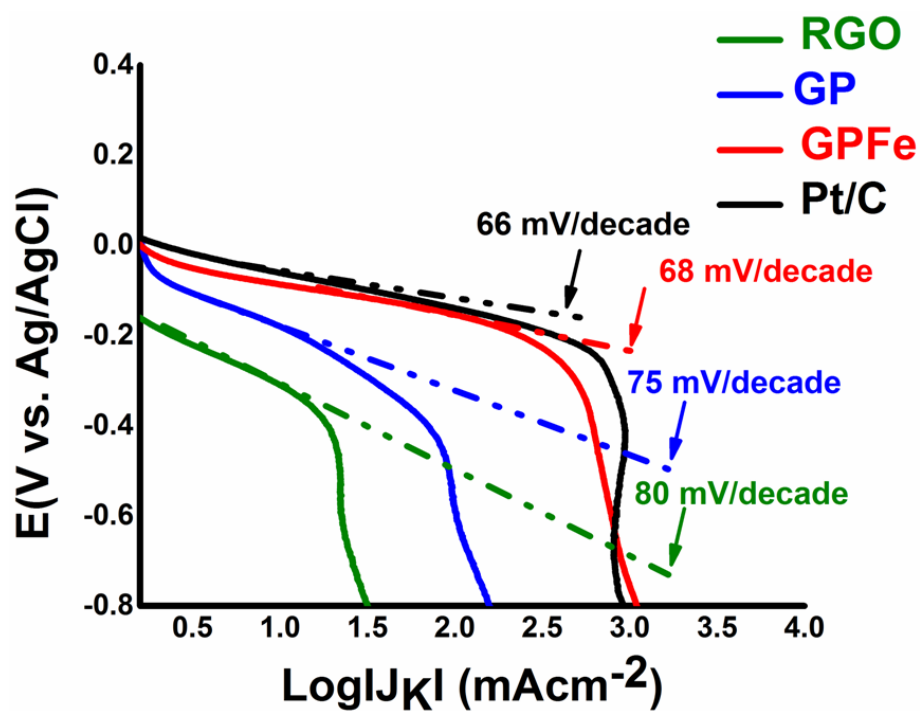

**Fig. S5** Tafel plots for pristine RGO, GP, GPFe and Pt/C derived by the mass-transport correction of corresponding LSV data at a rotation rate of 1,600 rpm in  $\text{O}_2$ -saturated 0.1 M KOH solution.

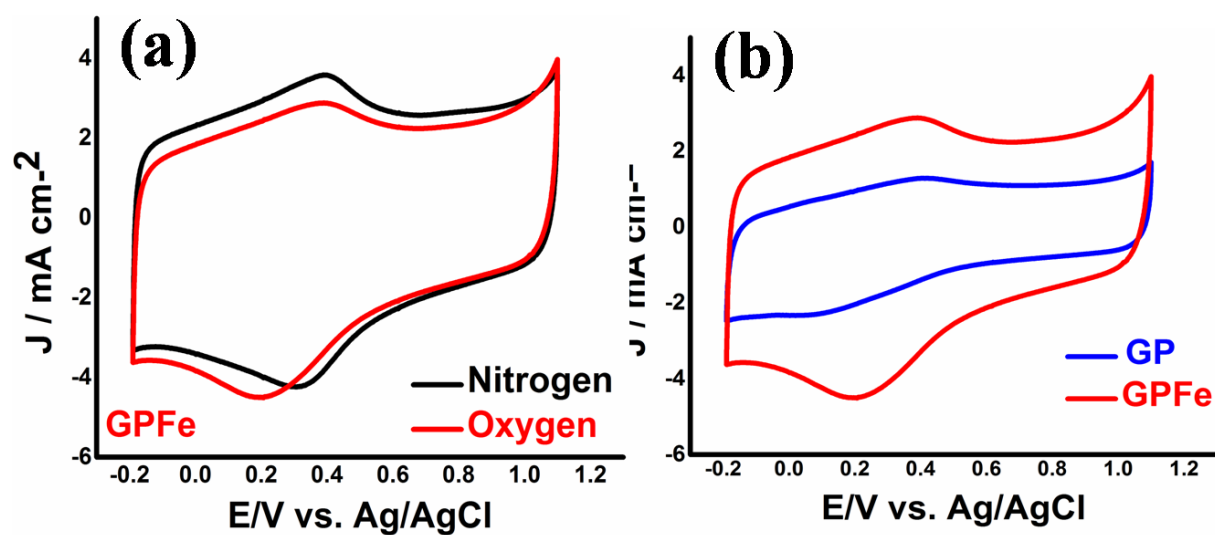

**Fig. S6** (a) CV curves at scan rate of  $50 \text{ mVs}^{-1}$  for GPFe in  $\text{N}_2$ - or  $\text{O}_2$ -saturated  $0.5 \text{ M H}_2\text{SO}_4$ , and (b) CV profiles for GP and GPFe in  $\text{O}_2$ -saturated  $0.5 \text{ M H}_2\text{SO}_4$ .

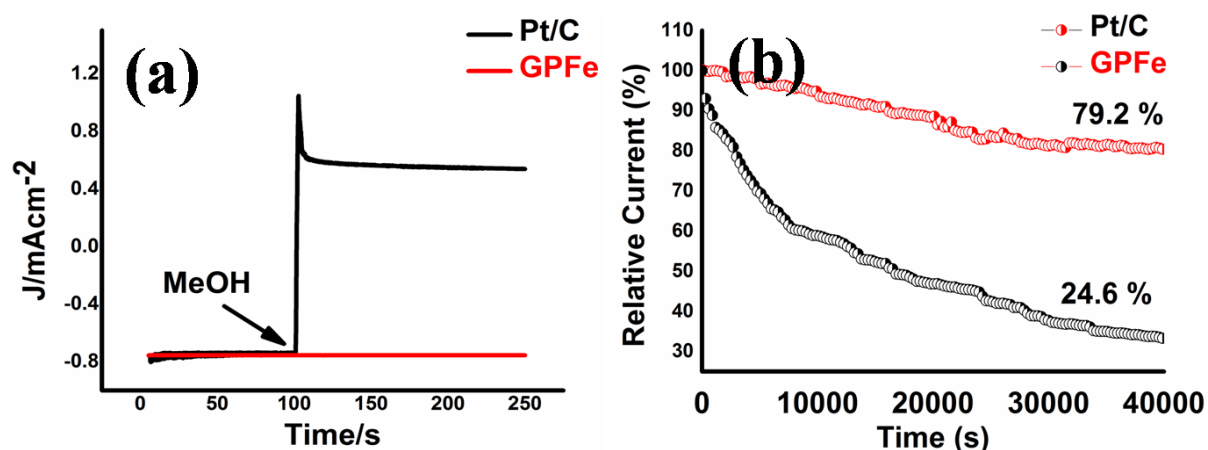

**Fig. S7** (a) CA curves at -0.3 V in O<sub>2</sub>-saturated 0.1 M KOH solution before and after addition of 3.0 M methanol, and (b) relative J-t responses vs. time at -0.3 V in O<sub>2</sub>-saturated 0.1 M KOH solution for GPFe and 20 wt% Pt/C (E-TEK) electrodes.

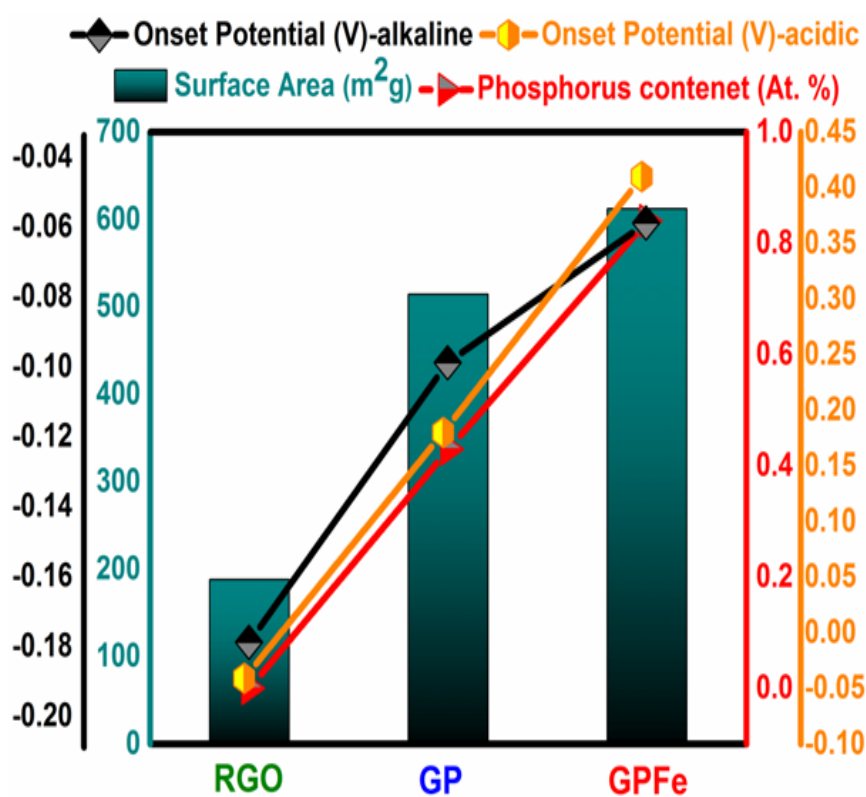

**Fig. S8** Comparison of P content, surface area and onset potential in alkaline and acidic media for pristine RGO, GP and GPFe.



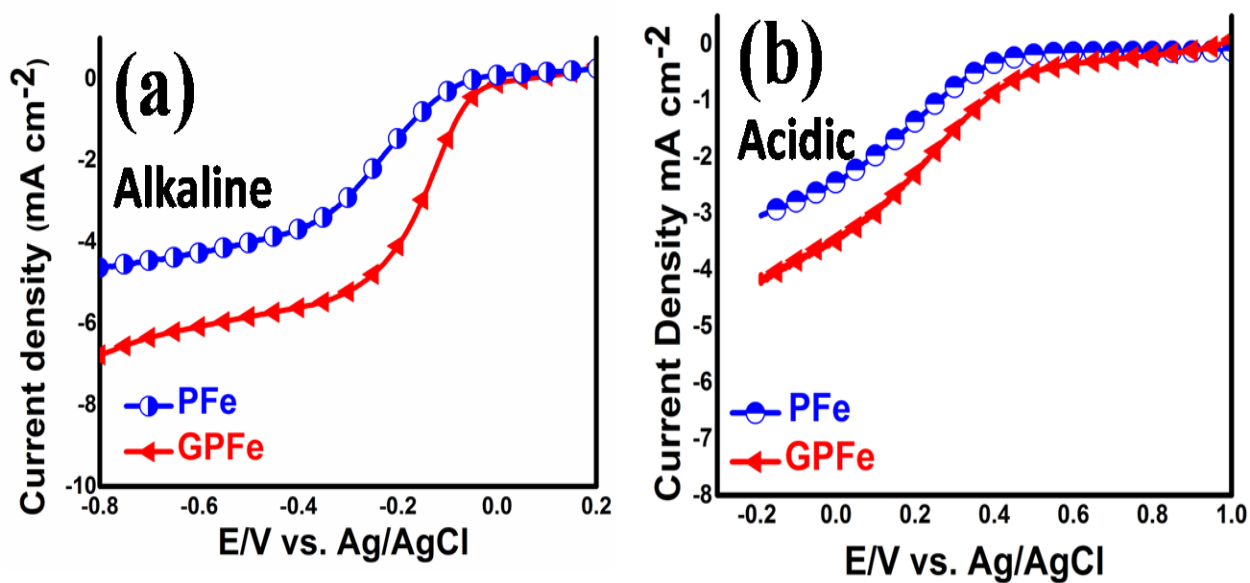

**Fig. S9** linear sweep voltammograms (scan rate: 10 mV/s and rotation speed: 1,600 rpm) for PFe and GPFc catalysts in  $O_2$ -saturated (a) 0.1 M KOH, and (b) 0.5 M  $H_2SO_4$  solution, respectively.

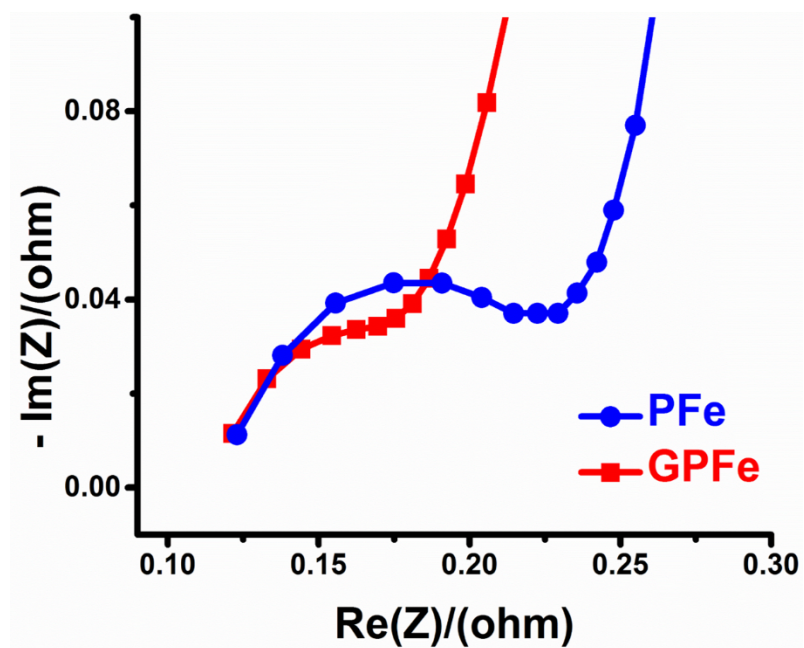

**Fig. S10** EIS Nyquist plots measured for the PFe and GPF samples in O<sub>2</sub>-saturated 0.5 M H<sub>2</sub>SO<sub>4</sub> solution.

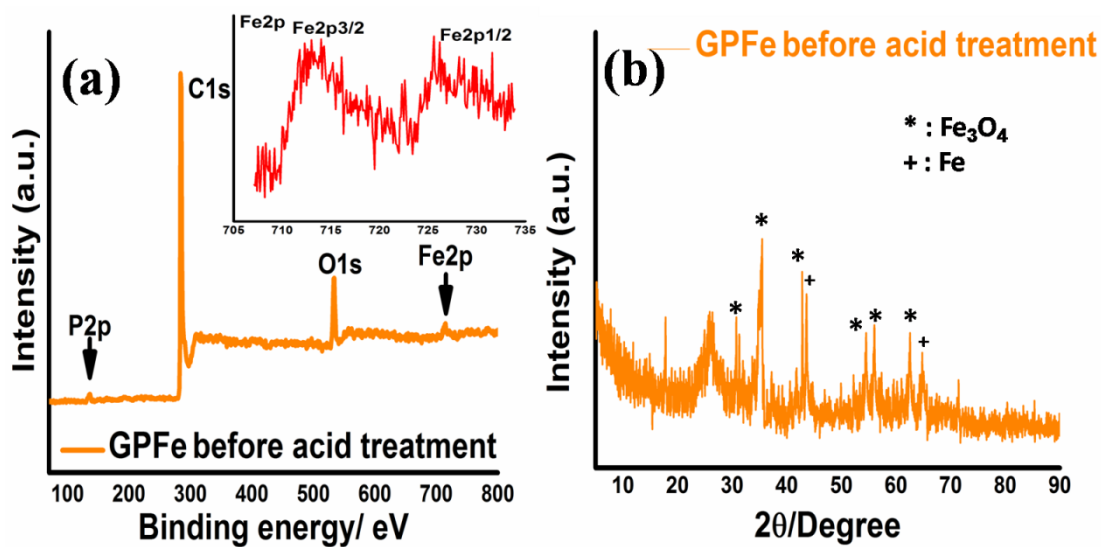

**Fig. S11** (a) XPS survey spectrum and Fe 2p narrow scan spectrum and (b) XRD pattern of GPFe before acid treatment.

**Table S2** Surface element contents obtained from the XPS analysis for GPFe before and after acid treatment

| Atomic composition (%)     |       |      |      |       |
|----------------------------|-------|------|------|-------|
| Sample                     | C 1s  | O 1s | P 2p | Fe 2p |
| GPFe before acid treatment |       |      |      |       |
|                            | 88.81 | 9.31 | 0.85 | 1.03  |
| GPFe after acid treatment  |       |      |      |       |
|                            | 94.24 | 4.32 | 0.84 | 0.6   |

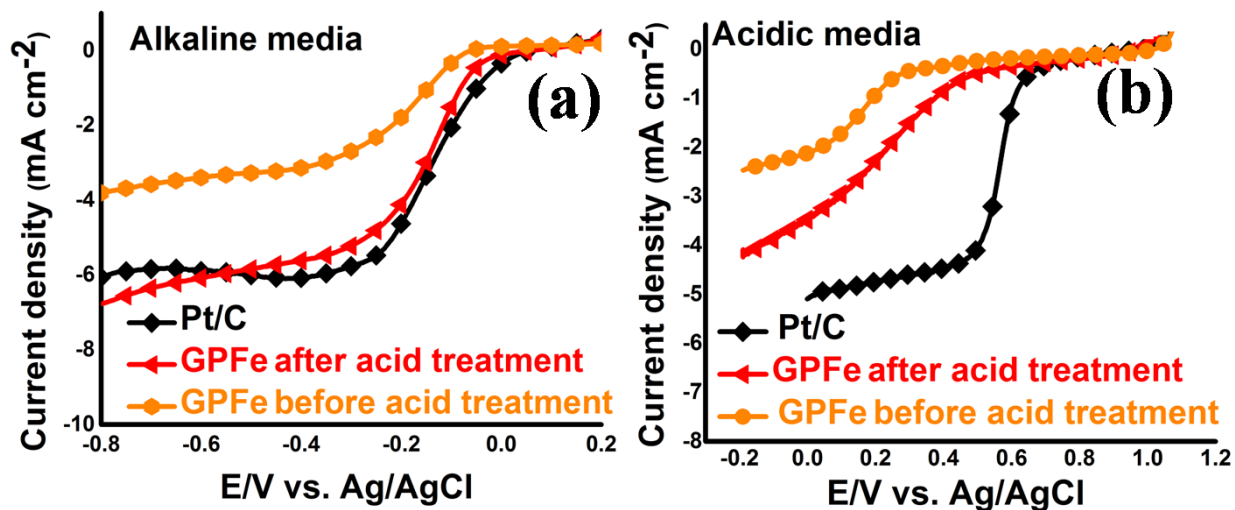

**Fig. S12** linear sweep voltammograms (scan rate: 10 mV/s and rotation speed: 1,600 rpm) for GPFe catalyst before and after acid treatment, and 20 wt% Pt/C (E-TEK) electrodes in  $O_2$ -saturated in (a) 0.1 M KOH, and (b) 0.5 M H<sub>2</sub>SO<sub>4</sub> solution, respectively.
